# Supplementary material for: A Functional Gene Array for Detection of Bacterial Virulence Elements
Source: PLoS One. 2008 May 14;3(5):e2163. doi: 10.1371/journal.pone.0002163 (PMC2367441; doi:10.1371/journal.pone.0002163)
Supplement: Table S1 — Expected presence or absence of orthologs for target gene families and actual detection results for four organisms tested (E. coli O157:H7 EDL 933, S. enterica serovar paratyphi, S. saprophyticus. and S. pyogenes). (0.09 MB XLS) [file pone.0002163.s001.xls]

## Sheet: xmset_fam_details.txt
Family ID	Gene family representation in organism				Detection results for organism				Functional group(s)	Gene family description
	E.coli O157:H7 EDL 933	S.enterica paratyphi ATCC 9150	S.saprophyticus ATCC 15305	S.pyogenes MGAS5005	E.coli O157:H7 EDL 933	S.enterica paratyphi ATCC 9150	S.saprophyticus ATCC 15305	S.pyogenes MGAS5005
92499	present	present	absent	absent	TP	TP	FP	TN	adhesion	hemagglutinin (Hep_Hag) repeat protein; hemagglutinin (Hep_Hag) repeat protein, autotransporter
8339	present	absent	absent	absent	TP	TN	TN	TN	antibiotic resistance	ampC Beta-lactamase precursor (EC 3.5.2.6)
8411	present	present	absent	absent	TP	FN	TN	TN	antibiotic resistance	arnA Bifunctional polymyxin resistance arnA protein
98321	present	present	absent	present	TP	TP	TN	TP	antibiotic resistance	cmlA chloramphenicol resistance; bcr bicyclomycin resistance protein
8258	present	present	absent	present	TP	FN	TN	FN	antibiotic resistance	cmlR chloramphenicol resistance protein
8308	present	present	present	present	TP	TP	FN	FN	antibiotic resistance	dfrA Dihydrofolate reductase (EC 1.5.1.3)
8463	present	present	absent	absent	TP	TP	TN	TN	antibiotic resistance	fsr fosmidomycin resistance protein
8483	present	present	absent	absent	TP	TP	TN	TN	antibiotic resistance	lpxD UDP-3-O-[3-hydroxymyristoyl] glucosamine N-acyltransferase (EC 2.3.1.-)
98246	present	present	absent	absent	TP	FN	TN	TN	antibiotic resistance	marB
8541	present	present	absent	absent	TP	TP	FP	TN	antibiotic resistance	marC multiple antibiotic resistance protein
8288	present	present	absent	absent	TP	FN	TN	TN	antibiotic resistance	mdfA, mdtA
8491	present	present	absent	absent	TP	TP	TN	TN	antibiotic resistance	mdt(P,Q) tripartite efflux system composed of mdtN, mdtO and mdtP
8485	present	present	absent	absent	TP	TP	TN	TN	antibiotic resistance	mdtH confers resistance to norfloxacin and enoxacin.
8489	present	absent	absent	absent	TP	TN	TN	TN	antibiotic resistance	mdtO tripartite efflux system composed of mdtN, mdtO and mdtP
8280	present	present	absent	absent	TP	TP	TN	TN	antibiotic resistance	mreB actin-like ATPase involved in rod shape-determining
8497	present	present	absent	absent	TP	TP	TN	TN	antibiotic resistance	myrA mycinamicin-resistance protein
8503	present	present	absent	absent	TP	FN	TN	TN	antibiotic resistance	pmrD polymyxin B resistance protein
8266	present	present	absent	present	TP	FN	TN	FN	antibiotic resistance	rarD chloramphenicol-sensitive protein
8513	present	present	absent	absent	TP	TP	TN	TN	antibiotic resistance	tehA Tellurite resistance protein
8515	present	present	absent	absent	TP	FN	TN	TN	antibiotic resistance	tehB Tellurite resistance protein
8311	present	present	absent	present	TP	TP	TN	TP	antibiotic resistance	tetV, protein has 10 TM domains, possible efflux pump, possible drug aniporter enabling efflux of te
98256	present	present	present	present	TP	TP	FN	TP	antibiotic resistance	uppp Undecaprenyl-diphosphatase (EC 3.6.1.27)
284	present	present	absent	absent	TP	FN	TN	TN	anti-elastin	ecotin, protease inhibitor
2263	present	absent	absent	absent	TP	TN	TN	TN	biofilm formation	hmsF, pgaB biofilm formation
302	present	absent	absent	absent	TP	TN	TN	TN	biofilm formation	hmsH, pgaA, biofilm formation
1963	present	present	absent	absent	TP	TP	TN	TN	biofilm formation	hmsP negative regulator of biofilm formation in y. pestis
2010	present	absent	absent	absent	TP	TN	TN	TN	biofilm formation	hmsR/icaA IM protein, polymerizes ?-1,6-GlcNAc, biofilm PIA synthesis N-glycosyltransferase icaA (EC
2275	present	absent	absent	absent	TP	TN	TN	TN	biofilm formation	hmsS, pgaD, biofilm formation Y.pestis
300	present	present	present	absent	TP	FN	FN	TN	biofilm formation	icaB, notB, cda, polysaccharide or chitin deacetylase (icaB in icaADBC)
2429	present	present	absent	absent	TP	TP	TN	TN	capsular polysaccharide synthesis	gmhA putative sedoheptulose 7-phosphate isomerase, phosphoheptose isomerase (EC 5.3.1.-)
2457	present	present	absent	absent	TP	TP	TN	TN	capsular polysaccharide synthesis	manC, putative GDP-mannose pyrophosphorylase, mannose-1-phosphate guanylyltransferase [GDP] (EC 2.7.
2433	present	present	absent	absent	TP	TP	TN	TN	capsular polysaccharide synthesis	wcbK GDP sugar epimerase/dehydratase
2425	present	present	absent	absent	TP	FN	TN	TN	capsular polysaccharide synthesis	wcbN putative D-glycero-d-manno-heptose 1,7-bisphosphate phosphatase, (EC 3.1.3.-)
2421	present	present	absent	present	TP	FN	TN	FN	capsular polysaccharide synthesis	wcbP dehydrogenase/reductase protein
2415	present	present	absent	absent	TP	TP	TN	TN	capsular polysaccharide synthesis	wcbS UDP-3-O-[3-hydroxymyristoyl] N-acetylglucoseamine deacetylase, UDP-3-O-acyl-GlcNAc deacetylase,
2413	present	present	absent	present	TP	TP	TN	TP	capsular polysaccharide synthesis	wcbT acyl-CoA transferase (EC 2.3.1.-)
8583	present	present	absent	present	TP	TP	TN	FN	capsule biosynthesis	capD, required for capsule biosynthesis in Bacillus anthracis
2342	present	present	absent	absent	TP	FN	TN	TN	chaperone for type III secretion	bicA, sycD, ipgC, lcrH, sicA, ygeG type III secretion chaperone
114	present	present	absent	absent	TP	FN	TN	TN	chemotaxis	cheW, chemosensation adapter ( H.pylori cheW )
112	present	present	present	present	TP	TP	FN	TP	chemotaxis	cheY like two component response regulator
9218	present	present	absent	absent	TP	FN	TN	TN	flagella	fla (A,B,C,E), flagellin; fla(A,B), fli(C,D,J,K,M,N,O), filament protein flagella
237	present	present	absent	absent	TP	FN	TN	TN	flagella	flgC, flagellar basal-body protein
227	present	present	absent	absent	TP	FN	TN	TN	flagella	flgD, flagellar hook assembly protein, hook capping protein
97234	present	present	absent	absent	TP	TP	TN	TN	flagella	flgG, flagellar basal-body protein; flgE, flagellar hook protein
229	present	present	absent	absent	TP	TP	TN	TN	flagella	flgH, flagellar basal-body L-ring protein
233	present	present	absent	absent	TP	FN	TN	TN	flagella	flgI, flagellar basal-body P-ring protein
9223	present	present	absent	absent	TP	TP	FP	TN	flagella	flgK, flagellar hook associated protein (hap1); flgK, between flgL and flgE, hook associated protein 1
225	present	present	absent	absent	TP	FN	TN	TN	flagella	fliD, flagellar cap protein, possible adhesin (hap2)
235	present	present	absent	absent	TP	TP	TN	TN	flagella	fliE, flagellar basal-body protein
247	present	present	absent	absent	TP	TP	TN	TN	flagella	fliG, flagellar motor switch protein
251	present	present	absent	absent	TP	TP	TN	TN	flagella	fliM, flagellar motor switch protein
249	present	present	absent	absent	TP	FN	TN	TN	flagella	fliN, flagellar switch protein
255	present	present	absent	absent	TP	FN	TN	TN	flagella	fliS, flagellin-specific chaperone
2243	present	present	absent	absent	TP	FN	TN	TN	flagella	motA flagellar motor rotation, proton motor (H.pylori motA)
7190	present	present	absent	absent	TP	FN	TN	TN	flagella	motB, along with motA, converts proton energy into torque for flagellar motor
92326	present	present	absent	absent	TP	TP	TN	TN	flagella; type III secretion	fliI, flagellar export protein; yscN, hrcN, hrpB6, type III secretion ATP synthase; bsaS, invC, spaL, mxiB, ssaN like, type III secretion system protein, similar to ATP synthase beta c
9270	present	present	absent	absent	TP	FN	TN	TN	flagella; type III secretion	fliR, flagellar biosynthesis protein; yscT, type III secretion
9422	present	present	absent	absent	TP	TP	TN	TN	flagella; type III secretion or flagella	fliF, flagellar basal-body M-ring protein; yscJ, hrpB3, ssaJ or FliF or nolT
506	present	present	present	present	TP	TP	TP	TP	GSP	secA, secA2 general secretory pathway
512	present	present	absent	present	TP	TP	TN	FN	GSP	secE, general secretory pathway
514	present	present	present	present	TP	TP	FN	TP	GSP	secG, general secretory pathway
509	present	present	present	present	TP	TP	FN	TP	GSP	secY, general secretory pathway
7270	present	present	absent	absent	TP	TP	TN	TN	iron acquisition-siderophore synthesis	2,3-dihydro-2,3-dihydroxybenzoate dehydrogenase
2530	present	present	absent	absent	TP	TP	TN	FP	iron acquisition-siderophore synthesis	BPSS1775, Ferrichrysobactin, Ferrioxamine, Fe(III)-pyochelin receptor, possible tonB dependent recep
92536	present	present	absent	absent	TP	TP	TN	TN	iron acquisition-siderophore synthesis	BPSS1777, putative siderophore related non-ribosomal peptide synthetase; BPSS1778, putative siderophore related non-ribosomal peptide synthetase
7268	present	present	absent	absent	TP	TP	TN	TN	iron acquisition-siderophore synthesis	entB like, isochorsmatase, siderophore biosynthesis, enterochelin synthase B (EC 3.3.2.1)
7211	present	present	absent	absent	TP	FN	TN	TN	iron acquisition-siderophore synthesis	entD, enterobactin synthetase component D, 4-phosphopantetheinyl transferase entD (EC 2.7.8.-)
2544	present	present	absent	absent	TP	TP	TN	TN	iron acquisition-siderophore synthesis	irp5, ybtE, pchD salicyl-AMP ligase, salicylate-activating enzyme, siderophore biosynthesis, enterob
2538	present	present	absent	present	TP	TP	TN	TP	iron acquisition-siderophore synthesis	pchA, entC, dhbC, putative salicylate biosynthesis isochorismate synthase,(EC 5.4.4.2) or anthranil
98562	present	present	present	present	TP	TP	TP	TP	iron acquisition-siderophore transport	fec(C,D) family (eg. hmuU [hmuTUV] in Y.pestis) iron transport IM permease, ABC-type Fe3+-siderophor; fhuB, duplicated permease domains
286	present	present	absent	absent	TP	FN	TN	TN	iron acquisition-siderophore transport	fhuD, ferrichrome-binding periplasmic protein precursor
288	present	present	absent	absent	TP	FN	TN	TN	iron acquisition-siderophore transport	fhuF, (ysuF) ferric iron reductase
292	present	absent	absent	absent	TP	TN	TN	FP	iron acquisition-siderophore transport	hmuR (hemR), a TonB dependent OM receptor for hemoproteins
290	present	absent	absent	absent	TP	TN	TN	TN	iron acquisition-siderophore transport	hmuS, (hemS) hemin degredation
294	present	absent	absent	absent	TP	TN	TN	TN	iron acquisition-siderophore transport	hmuT, siderophore binding protein, part of an ABC transporter (hmuTUV)
92248	present	present	present	present	TP	TP	TP	TP	iron acquisition-siderophore transport	hmuV, ATP binding protein, part of an ABC transporter (hmuTUV); fhuC, ABC-type cobalamin/Fe3+-seiderophores transport systems, ATPase component; fecE like iron( III ) siderophore, dicitrate transport ATP binding protein (fecE like)
44	present	present	present	present	TP	TP	FN	TP	iron acquisition-transcriptional regulation	major iron response regulator(F.tularensis/H.pylori Fur) along with iron, acts to repress transcript
97260	present	present	present	present	TP	TP	TP	TP	iron acquisition-transport	fbpC like, iron( III ) transporter ATP-binding protein (sfuC like); sfuC or cysA iron( III ) transport ATP binding protein (sfuC like) or Sulfate/thiosulfate import ATP
173	present	present	absent	absent	TP	TP	TN	TN	iron acquisition-transport	feoB, inner membrane Fe(II)transport protein ( H.pylori feoB )
52	present	present	absent	absent	TP	TP	TN	TN	iron acquisition-transport peptide	tppB tri-peptide permease, possible di- or tri- peptide transporter ( F.tularensis iraB )
2485	present	present	absent	absent	TP	TP	TN	TN	LPS biosynthesis	apaH, bis(5-nucleosyl)-tetraphosphatase (EC 3.6.1.41)
11	present	present	absent	absent	TP	TP	TN	TN	macrophage colonization	M. tuberculosis mce homolog (F.tularensis FTT1249)
9	present	present	absent	absent	TP	TP	TN	TN	macrophage colonization	macrophage infectivity potentiator like protein(F.tularensis FTT1043)
60	present	present	absent	absent	TP	TP	TN	FP	macrophage colonization	minD, possible pump for toxic or radical ions( F.tularensis minD )
183	present	present	absent	absent	TP	FN	TN	TN	macrophage colonization	phoP, response regulator
1973	present	present	absent	absent	TP	FN	TN	TN	macrophage colonization	PhoQ, histadine Kinase
56	present	present	absent	absent	TP	TP	TN	TN	macrophage colonization	sspA, stringent starvation protein A, global transcriptional regulation( F.tularensis mglA )
58	present	present	absent	absent	TP	TP	TN	TN	macrophage colonization	sspB, stringent starvation protein B, global transcriptional regulation( F.tularensis mglB )
8389	present	absent	absent	present	TP	TN	TN	TP	multi-drug efflux pump	AbgT, efflux pump component, putative transporter family
98333	present	present	absent	absent	TP	TP	FP	FP	multi-drug efflux pump	acr(B,D,F)/mdt(B,C,F)/ttg(B,E,H) multi-drug efflux protein; AcrB/AcrD/AcrF family, cation/multidrug efflux pump
92586	present	present	absent	absent	TP	TP	TN	FP	multi-drug efflux pump	acrA/ttg(A,D,G)/mdtE like putative mulit-drug efflux protein; macA macrolide-specific multi-drug efflux pump; mdtA multi-drug transporter; mdtE like, periplasmic protein (HlyD family secretion protein)
8413	present	present	absent	absent	TP	FN	TN	TN	multi-drug efflux pump	arpC, mepC, opr(J,M), sepC, srpC, ttg(C,F,I) outer membrane efflux pump
8535	present	present	absent	absent	TP	FN	TN	TN	multi-drug efflux pump	ebr (A,B), emrE, mdtJ, qac(E,F) multi-drug resistance
98298	present	present	absent	present	TP	TP	FP	TP	multi-drug efflux pump	emr(B,Y) multi-drug resistance protein; major facilitator superfamily protein, ydiC; major facilitator superfamily export protein; putative efflux pump; agrA like, aminoglycoside resistance efflux transporter
2584	present	present	present	absent	TP	TP	TP	FP	multi-drug efflux pump	macB macrolide-specific ABC type efflux carrier
8355	present	present	present	absent	TP	FN	FN	TN	multi-drug efflux pump	mdtG, pmrA major-facilitator superfamily
8254	absent	present	present	present	FP	FN	FN	TP	multi-drug efflux pump	norA multi-drug resistance protein
98469	present	present	absent	absent	TP	TP	TN	TN	multi-drug efflux pump	norM, multi-drug resistance protein; mdtK, norM multi-drug resistance protein Na(+)/drug antiporter
8315	present	present	absent	absent	TP	TP	TN	TN	multi-drug efflux pump	putative major facilitator superfamily export protein
98453	present	present	absent	absent	TP	TP	TN	TN	multi-drug efflux pump; antibiotic resistance	emr(A,K) multi-drug resistance protein; mdtN tripartite efflux system composed of mdtN, mdtO and mdtP
148	present	present	absent	present	TP	TP	FP	TP	nitrogen metabolism	gdh, glutamate dehydrogenase (EC 1.4.1.2) ( H.pylori gdhA )
146	present	present	present	present	TP	TP	FN	TP	nitrogen metabolism	glutamine synthetase, Glutamate--ammonia ligase, (EC 6.3.1.2) ( H.pylori glnA )
9126	present	absent	absent	present	TP	TN	TN	TP	nitrogen metabolism-urease	ureA, Alpha subunit of urease holoenzyme ( H.pylori ureB ); ure1, ureC, allpha subunit of the urease enzyme, urea amidohydrolase (EC 3.5.1.5)
132	present	absent	absent	present	TP	TN	TN	TP	nitrogen metabolism-urease	ureG, urease assembly protein ( H.pylori ureG )
2518	present	present	absent	present	TP	TP	TN	FN	NO resistance	hmpA, NOD, flavohaemoprotein, Nitric oxide dioxygenase, NO oxygenase(EC 1.14.12.17)
317	present	present	absent	absent	TP	TP	TN	TN	peroxide resistance	katY catalase-peroxidase
2508	present	present	absent	absent	TP	TP	TN	TN	peroxide resistance	oxyR or estR, oxidative stress regulatory protein, hydrogen peroxide-inducible genes activator or es
9336	present	present	absent	absent	TP	TP	FP	FP	pH 6 antigen pili; type I fimbriae	psaB, myfB, caf1M, psaB, papD, etc. fimbrial chaperone; papD, fimbrial chaperone, P pilus assembly protein
91955	present	present	absent	absent	TP	TP	TN	FP	pH 6 antigen pili; type I fimbriae	psaC, papC, aggC, fimC, fimD, etc. Usher protein, outer memebrane protein; papC, usher protein, P pilus assembly protein
329	present	present	absent	absent	TP	FN	TN	TN	plasminogen actitvator	plasminogen activator, coagulase/fibrinolysin precursor (EC 3.4.23.48) or protease VII precursor (EC
2495	present	present	present	present	TP	TP	TP	FN	protease	probable serine protease do-like precursor (EC 3.4.21.-)
526	present	present	present	absent	TP	FN	FN	TN	rhamnose synthesis	rmlA, rhamnose/LPS biosynthesis, glucose-1-phosphate thymidylyltransferase (EC 2.7.7.24) (EC 2.7.7.2
92483	present	present	present	absent	TP	TP	FN	TN	rhamnose synthesis; LPS biosynthesis	rmlB, acbB, rhamnose biosynthesis, dTDP-glucose 4,6-dehydratase (EC 4.2.1.46); rmlB, spsJ, dTDP-glucose 4,6 dehydratase, spore coat polysaccharide biosynthesis protein (EC 4.2.1.
42	present	present	present	present	TP	TP	FN	TP	surface antigen synthesis	Carbohydrate/purine kinase, pfkB family(F.tularensis FTT0801c)
23	present	present	absent	present	TP	FN	TN	FN	surface antigen synthesis	probable sugar transferase (F.tularensis FTT0790)
21	present	present	present	present	TP	TP	FN	FN	surface antigen synthesis	PRTaseII phosphoribosyl transferase (F.tularensis FTT0789), Ribulose-phosphate 3-epimerase(EC 5.1.3.
25	present	present	absent	present	TP	TP	TN	TP	surface antigen synthesis	putative UDP-glucose 4-epimerase(F.tularensis FTT0791)
937	present	present	present	present	TP	TP	FN	TP	surface antigen synthesis; LPS biosynthesis	glycosyltransferase 2(F.tularensis FTT0797, FTT0798); wbi(E,F) glycosyl transferase (EC 2.-.-.-)
93	present	present	present	present	TP	TP	FN	TP	survive oxidative stress	ahpC, peroxiredoxin, alkyl hydorperoxide reductase, thioredoxin peroxidase (EC 1.11.1.15) ( H.pylori
91	present	present	present	present	TP	TP	FN	TP	survive oxidative stress	ahpF (EC 1.6.4.-) or thioredoxin reductase (EC 1.8.1.9) ( H.pylori trxB )
95	present	present	absent	present	TP	TP	TN	FN	survive oxidative stress	bcp, putative peroxiredoxin, Thioredoxin reductase, (EC 1.11.1.15) ( H.pylori bcp )
50	present	present	present	present	TP	TP	TP	TP	survive oxidative stress	Fe/Mn regulated superoxide dismutase (EC 1.15.1.1) sodB, sodF, sodM (F.tularensis sodB )
46	present	present	present	present	TP	TP	FN	TP	survive oxidative stress	ferritin, bacterioferritin (F.tularensis/H.pylori ftnA, pfr, napA)
144	present	present	absent	present	TP	TP	TN	FN	survive oxidative stress	nifS, synthesis of [Fe-S] cluster ( H.pylori nifS )
2246	present	present	absent	present	TP	FN	TN	FN	survive oxidative stress	peroxiredoxin (tpx) thiol peroxidase (EC 1.11.1.-)
2511	present	absent	absent	absent	TP	TN	TN	TN	survive oxidative stress	sodC, putative membrane attached superoxide dismutase, Cu-Zn, (EC 1.15.1.1)
89	present	present	present	present	TP	TP	TP	TP	survive oxidative stress	trx(1,2,3,F, H,M) thioredoxin and thioredoxin-like proteins ( H.pylori trxA )
92513	present	present	absent	present	TP	TP	TN	TP	survive oxidative stress; peroxide resistance	cat(A,B) catylase precursor, has signal peptide, (EC 1.11.1.6); catE, catA, catB, catylase HP II, (EC 1.11.1.6)
7326	present	present	absent	absent	TP	TP	TN	TN	TAT secretion	tat(A,E), TAT secretion, sec independent protein translocase
7324	present	present	absent	absent	TP	TP	TN	TN	TAT secretion	tatC, TAT secretion, sec independent protein translocase
7330	present	present	present	present	TP	TP	FN	FN	TAT secretion	tatD, TAT secretion, sec independent protein translocase, deoxyribonuclease
2144	present	absent	absent	absent	TP	TN	TN	TN	toxin	ccdA anti-toxin to ccdB
2156	present	present	absent	absent	TP	FN	TN	TN	toxin	entericidin(A,B), antitoxin/toxin pair
7205	present	present	absent	present	TP	FN	TN	FN	toxin	hemolysin III
2118	present	present	absent	absent	TP	TP	TN	TN	toxin	hlyE pore forming toxin of E.coli
2086	present	present	absent	absent	TP	FN	TN	TN	toxin	icsA Shigella flexneri actin polymerization
2102	present	present	present	absent	TP	TP	FN	TN	toxin	Mu conotoxins neurotoxin
2199	present	absent	absent	present	TP	TN	TN	TP	toxin	pemK toxin, cleaves single stranded RNA, E.coli plasmid pC15-1a
272	present	present	absent	present	TP	TP	TN	FN	toxin	tlyC, possible hemolysin
2354	present	present	absent	absent	TP	FN	TN	TN	toxin-type III secretion	bapC, iagB, ipgF like, type III secretion effector protein
2112	present	present	present	present	TP	FN	FN	TP	transcriptional control	agrA, response regulator for quorum-sensing
308	present	present	present	present	TP	TP	TP	TP	transcriptional control	ihfAB, integration host factor or DNA-binding protein HU-(alpha,beta)
382	present	present	absent	absent	TP	FN	TN	TN	transcriptional control	ymoA, hha, thermoregulation of virF (regulator of the yop virulon), haemolysin expression-modulating
2362	present	present	absent	absent	TP	TP	TN	TN	transcriptional regulation	bprB like, type III secretion regulation, response regulator
166	present	present	absent	absent	TP	TP	TN	TN	transporter	exbB, tolQ, energy providing protein required for some transporter or flagellar function ( H.pylori
92245	present	present	absent	absent	TP	TP	TN	TN	transporter	exbD, tolR, produces energy for some transporters and flagella ( H.pylori exbD ); exbD energy providing (H.pylori)
2132	present	present	absent	absent	TP	TP	FP	TN	transporter	tolA, colicin import protein
164	present	present	absent	absent	TP	TP	TN	TN	transporter	tonB, energy providing protein required for some transporter function ( H.pylori TonB )
2594	present	present	absent	absent	TP	TP	TN	TN	type I fimbriae	fimA, major or minor fimbrial subunit
2075	present	absent	absent	present	TP	FP	TN	TP	type I secretion	hlyB, rtxB, cyaB, lktB (VC1448) type I secretion channel, ATP binding IM protein (transport RTX, leu
2008	present	present	absent	absent	TP	TP	TN	TN	type I secretion	tolC outer membrane channel, part of type I secretion system, RND and MFS multi-drug-efflux systems.
92334	present	present	absent	absent	TP	FN	TN	TN	type III secretion or flagella; type III secretion	YscR or FliP; yscR, hrcR, hrpW or fliP, type III secretion or flagellar component; bsaW, hrcR, spaP, yscR like, type III secretion system protein
92336	present	present	absent	absent	TP	FN	TN	TN	type III secretion or flagella; type III secretion	YscS or FliQ; yscS, ssaS or fliQ, component of type III secretion system or Flagella (FliQ) (Y.pestis yscS); bsaX, spaQ, yscS like, type III secretion system protein
9239	present	present	absent	absent	TP	TP	TN	TN	type III secretion or flagella; type III secretion	YscU or FlhB; yscU, bsaZ, sctU, hrcU, spaS, ssaU type III secretion protein
9266	present	present	absent	absent	TP	TP	TN	TN	type III secretion or flagella; type III secretion	YscV or FlhA; yscV, hrpI, hrcV, hrpC2, ssaV or flhA, component of type III secretion system or Flagella (FlhA) (Y.; bsaQ, lcrD, invA, virH like, type III secretion system protein
74	present	present	absent	absent	TP	TP	TN	TN	type IV pili	pilus structural unit, minor pilin( F.tularensis pilE5, pilE4 )
92695	present	present	present	present	TP	TP	FN	TP	type IV pili; type IV pilus assembly or type II secretion; type IVB pili	pilT, required for pilus retraction/depolymerization ( F.tularensis pilT ); hofB type IV pilus protein or gspE, ATPase, substrate transfer, unfolding, chaperone type IV pilus o; pilT, twitching mobility protein, periplasmic location, promotes disassembly of pilus
82	present	present	present	absent	TP	TP	FN	TN	type IV pilus assembly or type II secretion	hofC type IV pilus protein, flaJ or gspF, inner membrane protein involved in type IV pilus assembly
64	present	present	absent	absent	TP	TP	TN	TN	type IV pilus assembly or type II secretion	pilQ, gspD, hofQ outer membrane pore, gated channel, required for pilus assembly similar to gspD ( F
589	present	absent	absent	absent	TP	TN	TN	TN	viral effector	DUS1, H1L vaccinia virus dual specificity protein phosphatase (EC 3.1.3.48) (EC 3.1.3.16)
